# Supplementary material
Source: Springer Nature journal article supplement (https://www.springermedizin.de/resource/supplementary/12903_2014_483_MOESM7_ESM.pdf/9516790)

# DMPO-OH

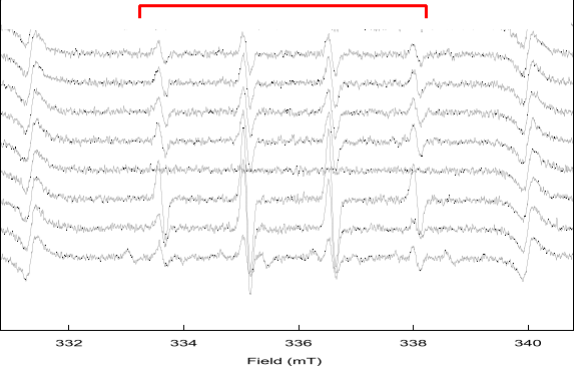

Supplement: MOESM7 [file 9516790]
